# Supplementary material for: Development and Validation of a Deep Learning Model for Histopathological Slide Analysis in Lung Cancer Diagnosis
Source: MDPI journal article supplement (doi:10.3390/cancers16081506), 2024-04-15
Supplement: s1 [file s1]

Supplementary files for  
*Development and Validation of a Deep Learning Model for Histopathological Slide Analysis in Lung Cancer Diagnosis*

Alhassan Ali Ahmed, Muhammad Fawi, Agnieszka Brychcy, Mohamed Abouzid, Martin Witt and Elżbieta Kaczmarek

**Click on the title to move to the page.**

***Supplementary File S1.*** (Pages 2 to 17: navigate to page 2 to check each figure separately)

***Supplementary Figure S1.*** Inputs and outputs for CNN model architecture

***Supplementary Figure S2.*** comparing the results of the designed algorithm on the collected slides for this side and images from an open-source repository: the Department of Pathology and Laboratory Medicine at Dartmouth-Hitchcock Medical Center (DHMC) [1].

***Table S1.*** Comparing the results of the model by images from Department of Pathology and Laboratory Medicine at Dartmouth-Hitchcock Medical Center (DHMC) [1].

| Image nr            | AI decision | Array  | Accuracy | Pathologist 1 | Pathologist 2 | Pathologist 3 | Pathologist 4 | Pathologist 5 | Pathologist 6 | Pathologist 7 | Pathologist 8 | Pathologist 9 | Pathologist 10 | Ref page | Path Accuracy |
|---------------------|-------------|--------|----------|---------------|---------------|---------------|---------------|---------------|---------------|---------------|---------------|---------------|----------------|----------|---------------|
| 1                   | Healthy     | <0.001 | 100%     | Healthy        | '1'!A1   | 100%          |
| 2                   | Healthy     | <0.001 | 100%     | Healthy        | '2'!A1   | 100%          |
| 3                   | Healthy     | <0.001 | 100%     | Healthy        | '3'!A1   | 100%          |
| 4                   | Healthy     | 0.05   | 100%     | Healthy        | '4'!A1   | 100%          |
| 5                   | Healthy     | 0.004  | 100%     | Healthy        | '5'!A1   | 100%          |
| 6                   | Healthy     | <0.001 | 100%     | Healthy       | Cancer         | '6'!A1   | 90%           |
| 7                   | Cancer      | 1      | 100%     | Not Certain    | '7'!A1   | 0%            |
| 8                   | Cancer      | 1      | 100%     | Not Certain   | Not Certain   | Cancer        | Not Certain   | Not Certain   | Cancer        | Not Certain   | Not Certain   | Not Certain   | Not Certain    | '8'!A1   | 20%           |
| 9                   | Cancer      | 1      | 100%     | Cancer         | '9'!A1   | 100%          |
| 10                  | Cancer      | 1      | 100%     | Cancer         | '10'!A1  | 100%          |
| 11                  | Cancer      | 1      | 100%     | Cancer        | Not Certain    | '11'!A1  | 90%           |
| 12                  | Cancer      | 1      | 100%     | Not Certain   | Cancer        | Cancer        | Cancer        | Cancer        | Cancer        | Cancer        | Not Certain   | Cancer        | Not Certain    | '12'!A1  | 70%           |
| 13                  | Cancer      | 1      | 100%     | Cancer        | Not Certain   | Cancer        | Not Certain   | Not Certain   | Cancer        | Not Certain   | Not Certain   | Cancer        | Not Certain    | '13'!A1  | 40%           |
| 14                  | Cancer      | 1      | 100%     | Cancer         | '14'!A1  | 100%          |
| 15                  | Cancer      | 1      | 100%     | Not Certain   | Not Certain   | Cancer         | '15'!A1  | 80%           |
| Years of experience |             |        |          | 3             | 2             | 20            | 10            | 6             | 33            | 18            | 18            | 7             | 2              | Average  | 79%           |

Intpretation: 1 = Cancer 100%; and < 0.5 = Healthy

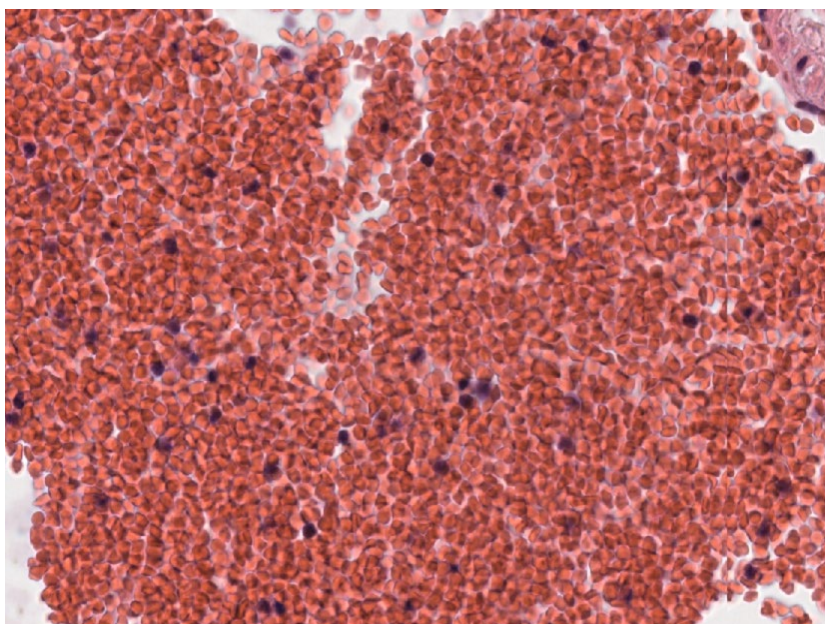

Out[13]: <matplotlib.image.AxesImage at 0x22e9df72790>

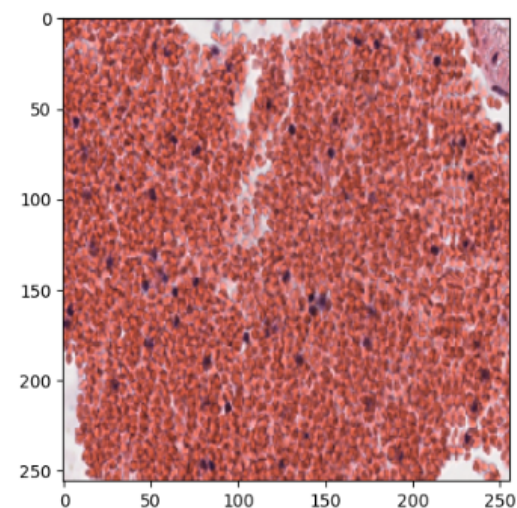

```
In [14]: # predict the class of the image
# predict method gives a probability whether the slide contains
# malignancy or not
# anything less than 0.5 means no malignancy found,
# greater than or equal to 0.5 means malignancy found
model.predict(image)
# 1 means 100% cancerous
# 0 means 100% Healthy cell
```

1/1 [=====] - 0s 137ms/step

Out[14]: array([2.6482826e-07], dtype=float32)

```
In [15]: # what did the model see to determine that the slide had malignancy
# Looking at the top 6 spots where the model found malignancy
malignant_spots(model.model, sample_image_path, confidence = 0.6)
```

Creating sliding windows over the picture ...

Getting predictions ...

5/5 [=====] - 7s 1s/step

No malignant spot was found with the used confidence rate 0.6. Try to lower it a bit!

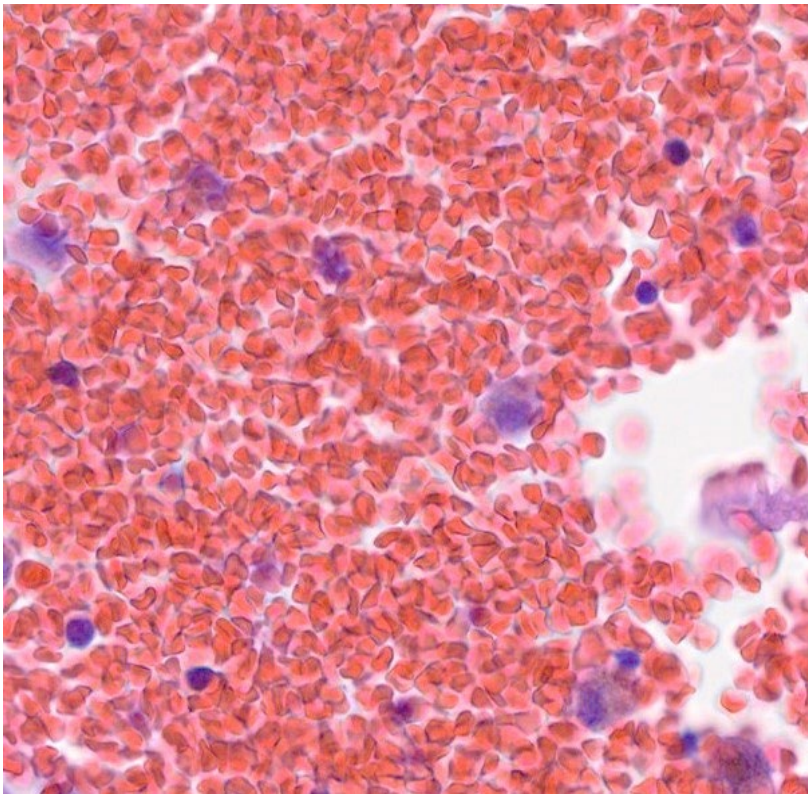

Out[18]: <matplotlib.image.AxesImage at 0x22e9dd4fed0>

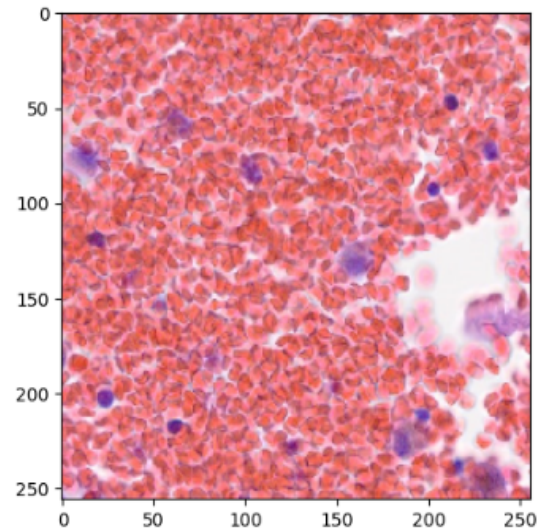

```
In [19]: # predict the class of the image
# predict method gives a probability whether the slide contains
# malignancy or not
# anything less than 0.5 means no malignancy found,
# greater than or equal to 0.5 means malignancy found
model.predict(image)
# 1 means 100% cancerous
# 0 means 100% Healthy cell
```

1/1 [=====] - 0s 214ms/step

Out[19]: array([1.4887766e-08], dtype=float32)

```
In [15]: # what did the model see to determine that the slide had malignancy
# looking at the top 6 spots where the model found malignancy
malignant_spots(model.model, sample_image_path, confidence = 0.6)
```

Creating sliding windows over the picture ...

Getting predictions ...

5/5 [=====] - 7s 1s/step

No malignant spot was found with the used confidence rate 0.6. Try to lower it a bit!

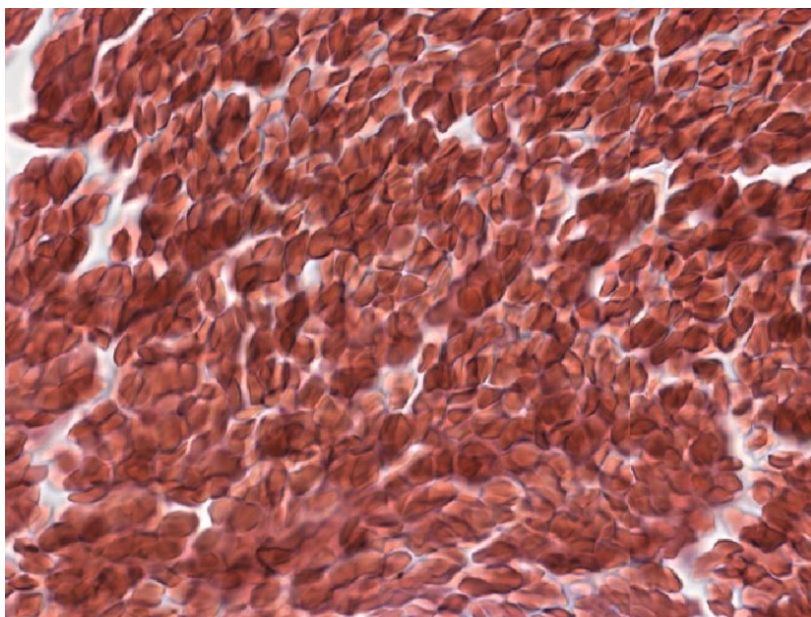

Out[22]: <matplotlib.image.AxesImage at 0x22ea66f1290>

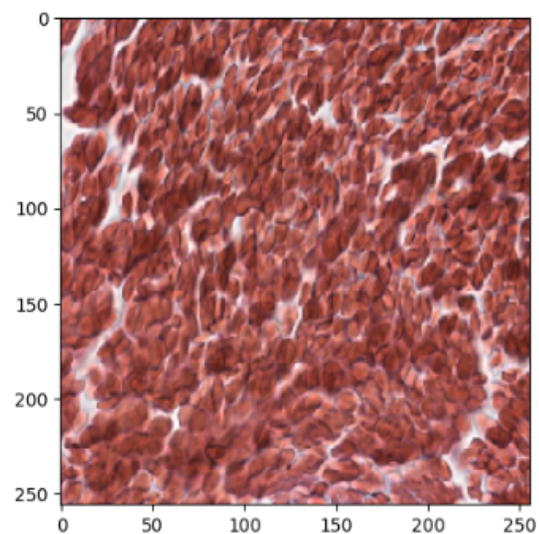

```
In [23]: # predict the class of the image
# predict method gives a probability whether the slide contains
# malignancy or not
# anything less than 0.5 means no malignancy found,
# greater than or equal to 0.5 means malignancy found
model.predict(image)
# 1 means 100% cancerous
# 0 means 100% Healthy cell
```

1/1 [=====] - 0s 80ms/step

Out[23]: array([0.00013303], dtype=float32)

```
In [24]: # what did the model see to determine that the slide had malignancy
# Looking at the top 6 spots where the model found malignancy
malignant_spots(model.model, sample_image_path, confidence = 0.6)
```

Creating sliding windows over the picture ...  
Getting predictions ...

5/5 [=====] - 7s 1s/step

No malignant spot was found with the used confidence rate 0.6. Try to lower it a bit!

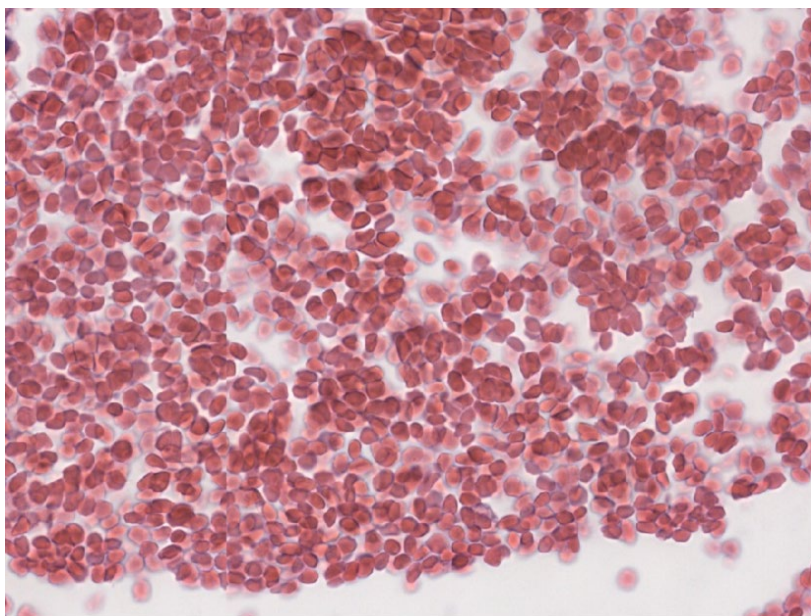

Out[27]: <matplotlib.image.AxesImage at 0x22ea78b0890>

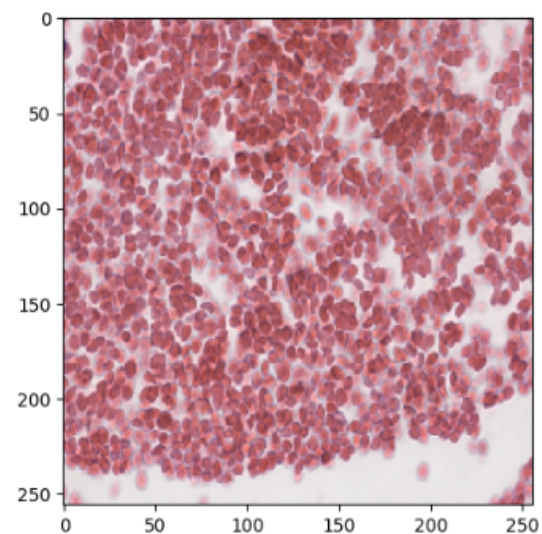

```
In [28]: # predict the class of the image
# predict method gives a probability whether the slide contains
# malignancy or not
# anything less than 0.5 means no malignancy found,
# greater than or equal to 0.5 means malignancy found
model.predict(image)
# 1 means 100% cancerous
# 0 means 100% Healthy cell
```

1/1 [=====] - 0s 82ms/step

Out[28]: array([0.05565841], dtype=float32)

```
In [29]: # what did the model see to determine that the slide had malignancy
# Looking at the top 6 spots where the model found malignancy
malignant_spots(model.model, sample_image_path, confidence = 0.6)
```

Creating sliding windows over the picture ...

Getting predictions ...

5/5 [=====] - 7s 1s/step

No malignant spot was found with the used confidence rate 0.6. Try to lower it a bit!

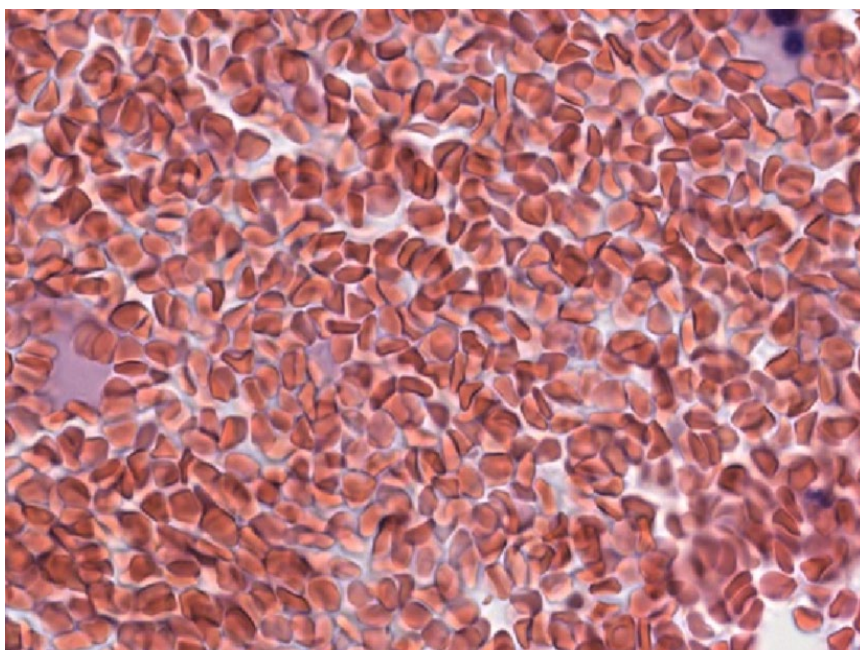

Out[32]: <matplotlib.image.AxesImage at 0x22ea775ec50>

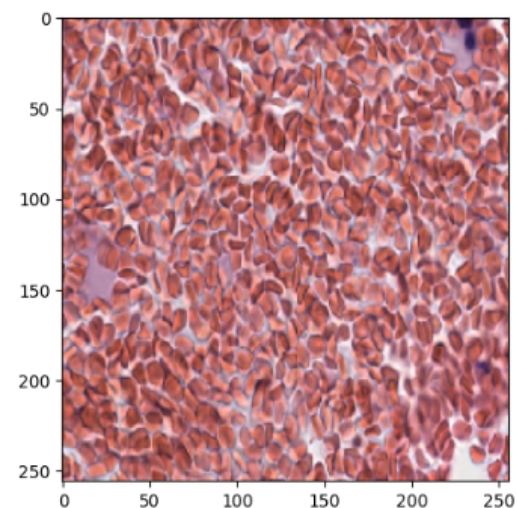

```
In [33]: # predict the class of the image
# predict method gives a probability whether the slide contains
# malignancy or not
# anything less than 0.5 means no malignancy found,
# greater than or equal to 0.5 means malignancy found
model.predict(image)
# 1 means 100% cancerous
# 0 means 100% Healthy cell
```

1/1 [=====] - 0s 70ms/step

Out[33]: array([0.00417446], dtype=float32)

```
In [34]: # what did the model see to determine that the slide had malignancy
# Looking at the top 6 spots where the model found malignancy
malignant_spots(model.model, sample_image_path, confidence = 0.6)
```

Creating sliding windows over the picture ...

Getting predictions ...

5/5 [=====] - 7s 1s/step

No malignant spot was found with the used confidence rate 0.6. Try to lower it a bit!

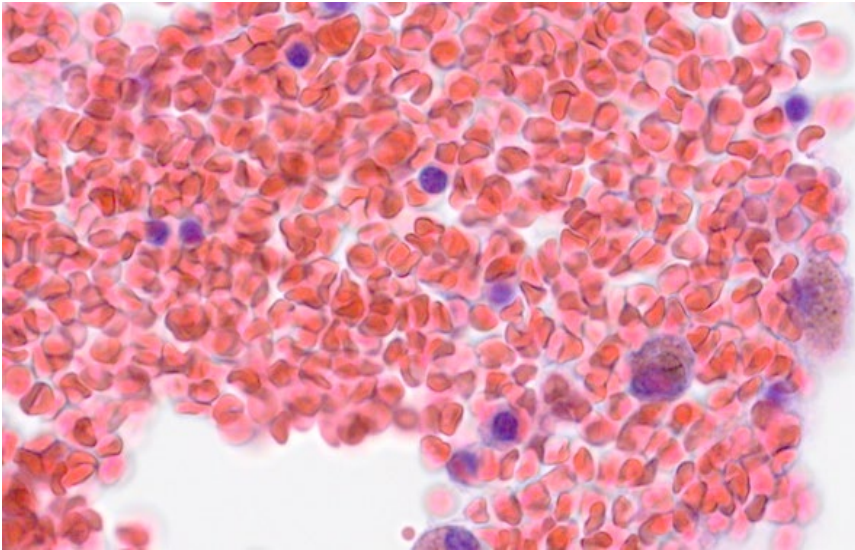

Out[37]: <matplotlib.image.AxesImage at 0x22ea77c1290>

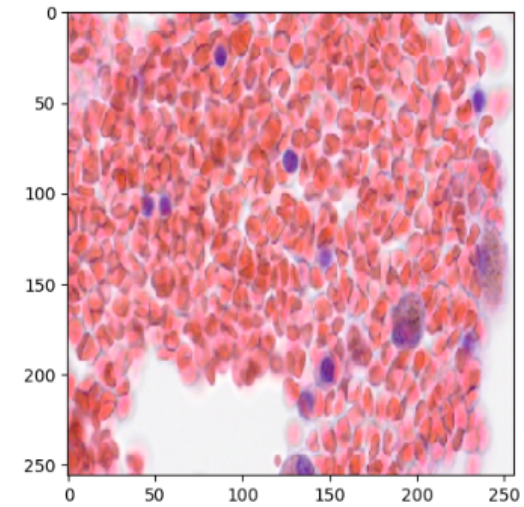

```
In [38]: # predict the class of the image
# predict method gives a probability whether the slide contains
# malignancy or not
# anything less than 0.5 means no malignancy found,
# greater than or equal to 0.5 means malignancy found
model.predict(image)
# 1 means 100% cancerous
# 0 means 100% Healthy cell
```

1/1 [=====] - 0s 78ms/step

Out[38]: array([7.149009e-07], dtype=float32)

```
In [39]: # what did the model see to determine that the slide had malignancy
# Looking at the top 6 spots where the model found malignancy
malignant_spots(model.model, sample_image_path, confidence = 0.6)
```

Creating sliding windows over the picture ...

Getting predictions ...

5/5 [=====] - 7s 1s/step

No malignant spot was found with the used confidence rate 0.6. Try to lower it a bit!

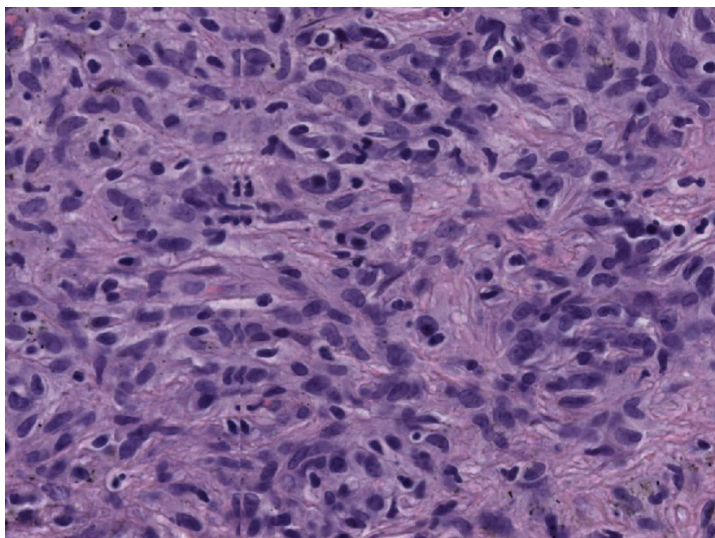

Out[42]: `matplotlib.image.AxesImage at 0x22ea7a127580`

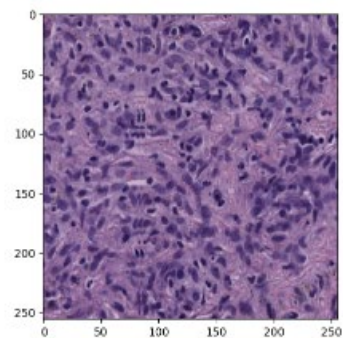

```
In [43]: # predict the class of the image
# predict method gives a probability whether the slide contains
# malignancy or not
# anything less than 0.5 means no malignancy found,
# greater than or equal to 0.5 means malignancy found
model.predict(image)
# 1 means 100% cancerous
# 0 means 100% healthy cell
```

1/1 [=====] - 0s 72ms/step

Out[43]: `array([1.], dtype=float32)`

```
In [44]: # what did the model see to determine that the slide had malignancy
# looking at the top 6 spots where the model found malignancy
malignant_spots(model.model, sample_image_path, confidence = 0.5)
```

Creating sliding windows over the picture ...  
Getting predictions ...  
5/5 [=====] - 7s 1s/step  
Drawing findings ...

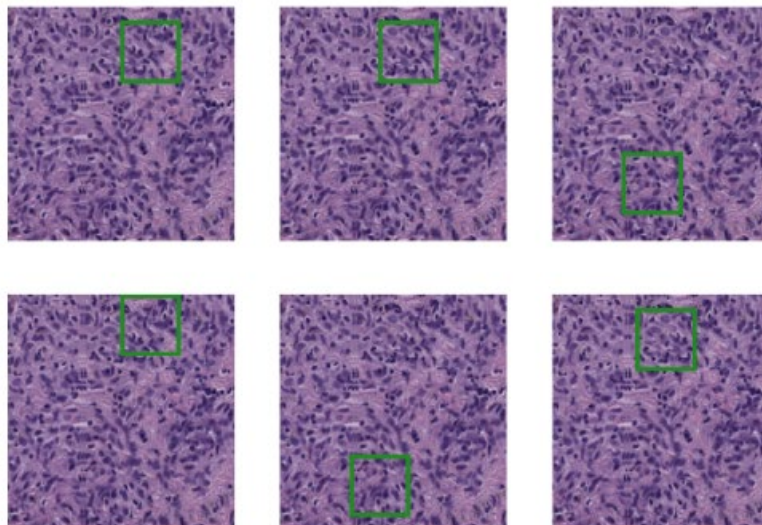

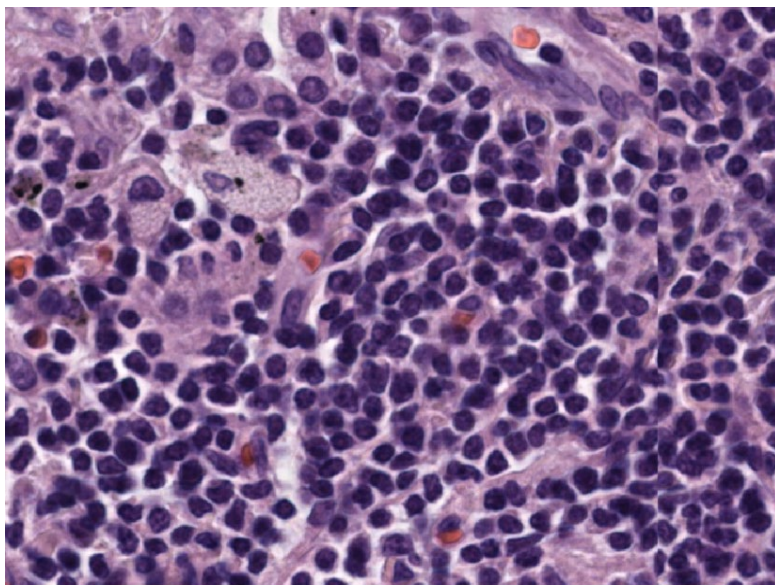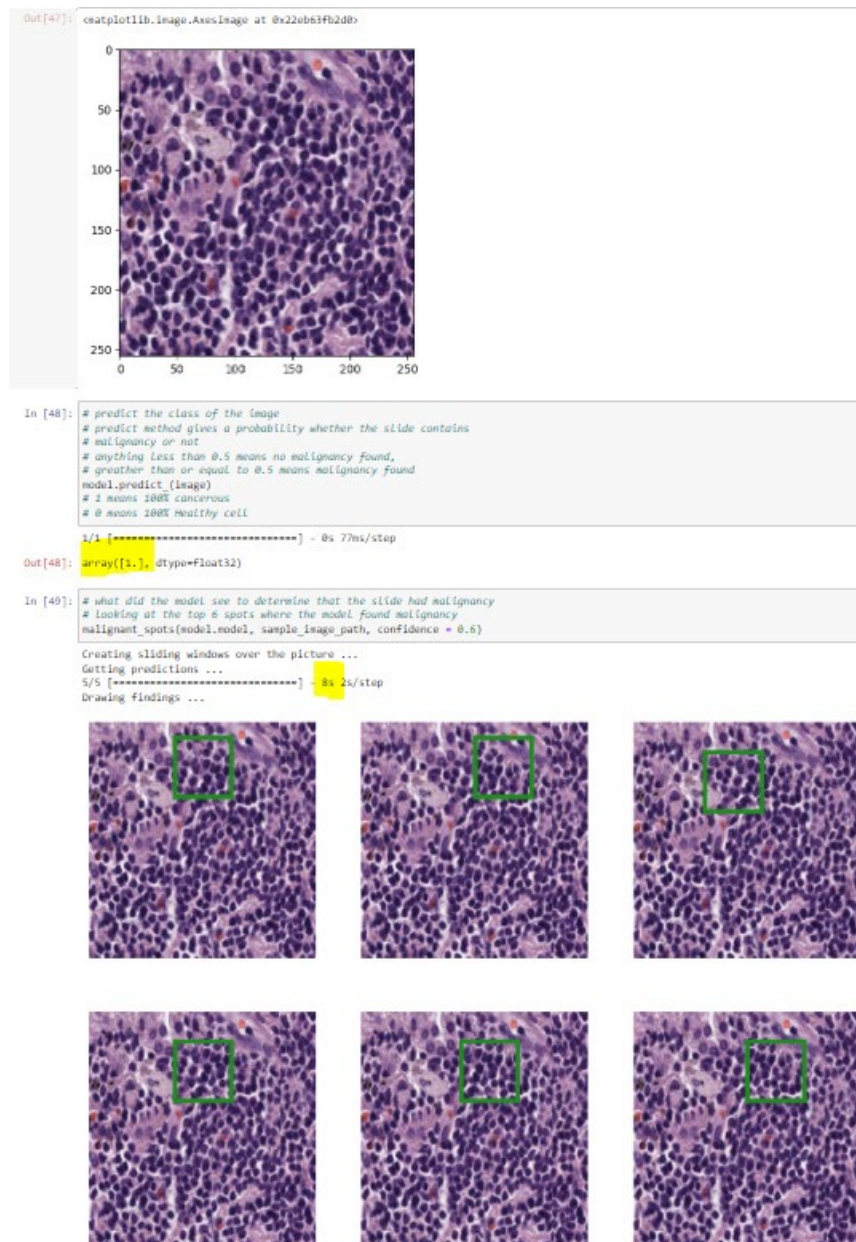

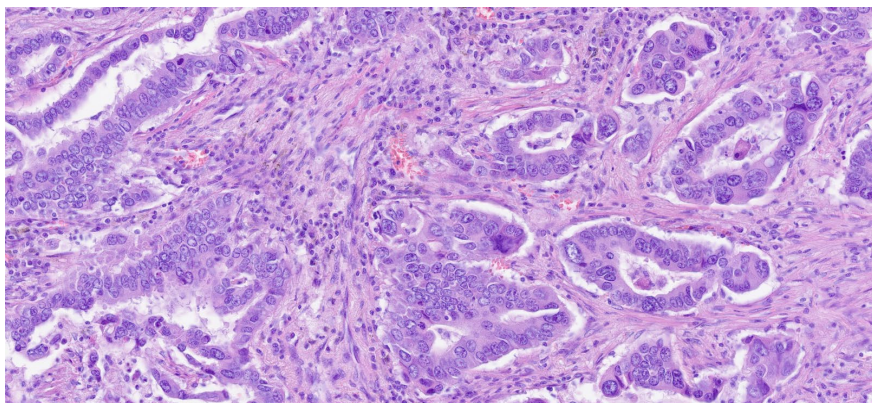

Out[52]: `matplotlib.image.AxesImage at 0x220a8d3ae180`

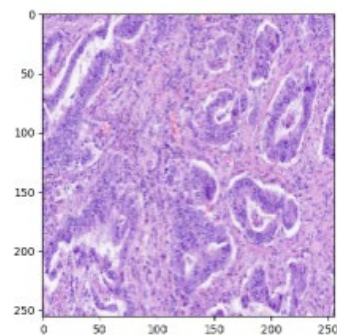

```
In [53]: # predict the class of the image
# predict method gives a probability whether the slide contains
# malignancy or not
# anything less than 0.5 means no malignancy found,
# greater than or equal to 0.5 means malignancy found
model.predict(image)
# 1 means 100% cancerous
# 0 means 100% healthy cell
```

1/1 [=====] - 0s 73ms/step

Out[53]: `array([1.], dtype=float32)`

```
In [54]: # what did the model see to determine that the slide had malignancy
# looking at the top 6 spots where the model found malignancy
malignant_spots(model.model, sample_image_path, confidence = 0.5)
```

Creating sliding windows over the picture ...  
Getting predictions ...  
5/5 [=====] - 7s 1s/step  
Drawing findings ...

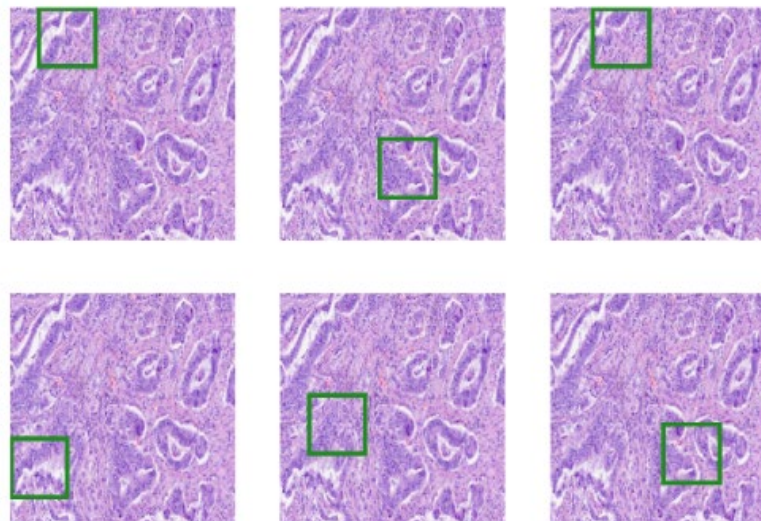

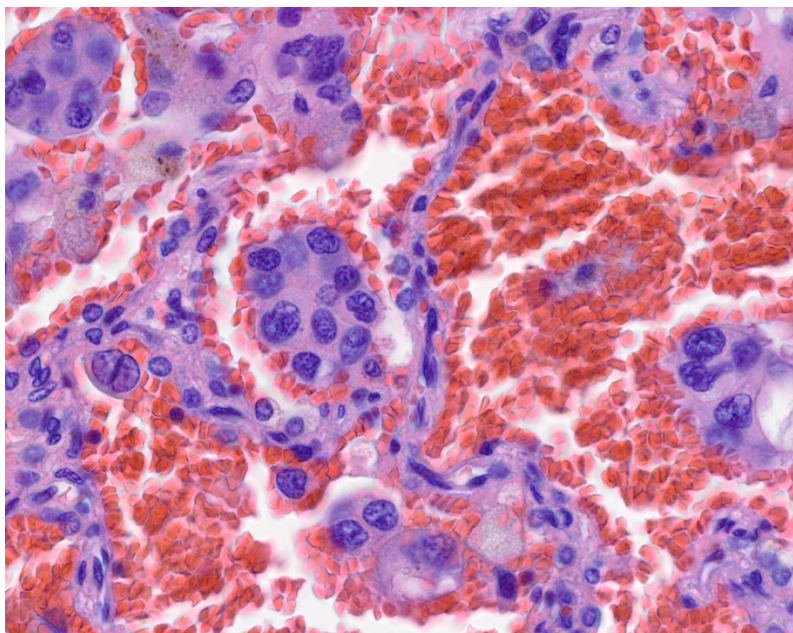

Out[57]: `matplotlib.image.AxesImage at 0x22ea8f68250`

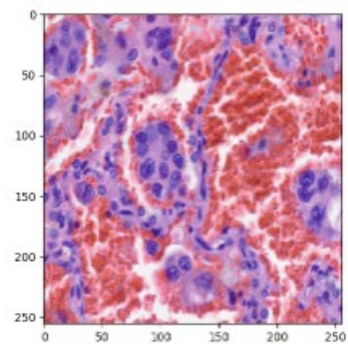

```
In [58]: # predict the class of the image
# predict method gives a probability whether the slide contains
# malignancy or not
# anything less than 0.5 means no malignancy found,
# greater than or equal to 0.5 means malignancy found
model.predict(image)
# 1 means 100% cancerous
# 0 means 100% healthy cell
```

1/1 [=====] - 0s 77ms/step

Out[58]: `array([1.], dtype=float32)`

```
In [59]: # what did the model see to determine that the slide had malignancy
# looking at the top 5 spots where the model found malignancy
malignant_spots(model.model, sample_image_path, confidence = 0.6)
```

Creating sliding windows over the picture ...  
Getting predictions ...  
5/5 [=====] - 7s 1s/step  
Drawing findings ...

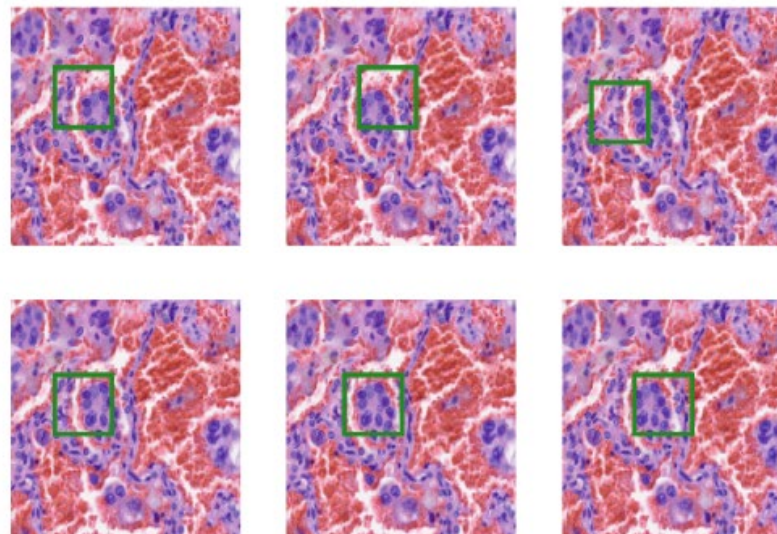

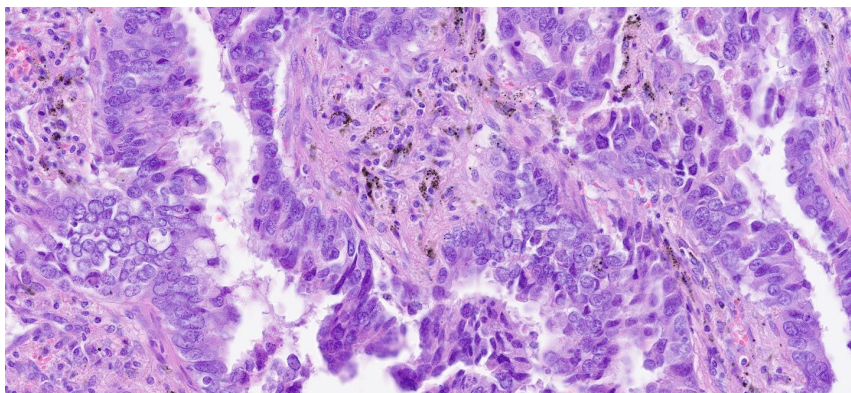

Out[62]: `matplotlib.image.AxesImage at 0x22ea8cb68d0`

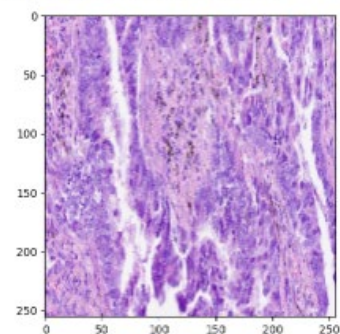

```
In [63]: # predict the class of the image
# predict method gives a probability whether the slide contains
# malignancy or not
# anything less than 0.5 means no malignancy found,
# greater than or equal to 0.5 means malignancy found
model.predict(image)
# 1 means 100% cancerous
# 0 means 100% healthy cell
```

1/1 [=====] - 0s 77ms/step

Out[63]: `array([1.], dtype=float32)`

```
In [64]: # what did the model see to determine that the slide had malignancy
# looking at the top 6 spots where the model found malignancy
malignant_spots(model.model, sample_image_path, confidence = 0.6)
```

Creating sliding windows over the picture ...  
Getting predictions ...  
5/5 [=====] - 7s 1s/step  
Drawing findings ...

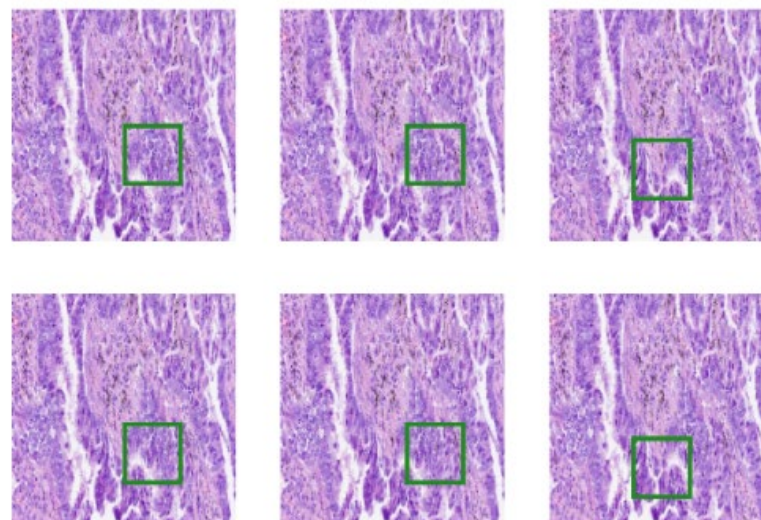

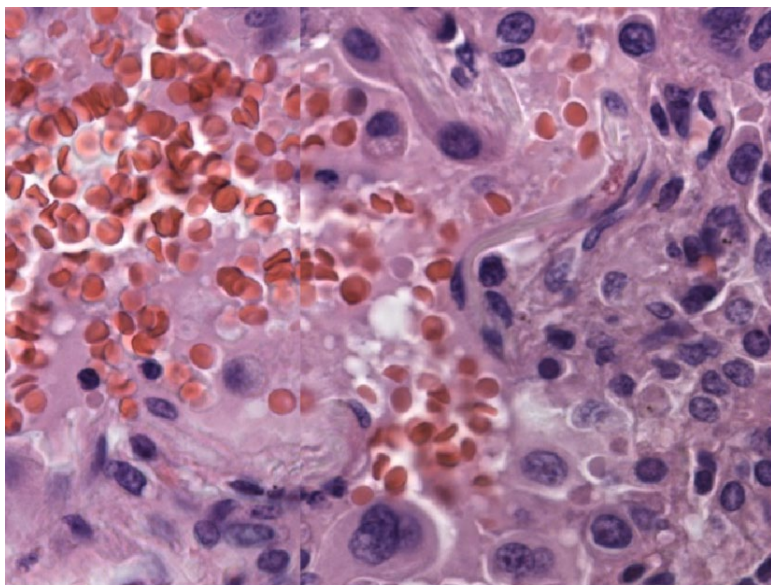

Out[57]: `matplotlib.image.AxesImage` at 0x22ea8ac3118>

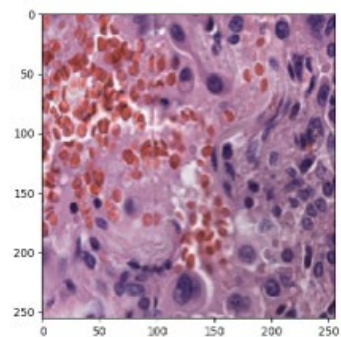

```
In [58]: # predict the class of the image
# predict method gives a probability whether the slide contains
# malignancy or not
# anything less than 0.5 means no malignancy found,
# greather than or equal to 0.5 means malignancy found
model.predict(image)
# 1 means 100% cancerous
# 0 means 100% healthy cell
```

1/1 [=====] - 0s 74ms/step

Out[58]: `array([1.], dtype=float32)`

```
In [59]: # what did the model see to determine that the slide had malignancy
# looking at the top 6 spots where the model found malignancy
malignant_spots(model.model, sample_image_path, confidence = 0.5)
```

Creating sliding windows over the picture ...  
 Getting predictions ...  
 5/5 [=====] - 7s 1s/step  
 Drawing findings ...

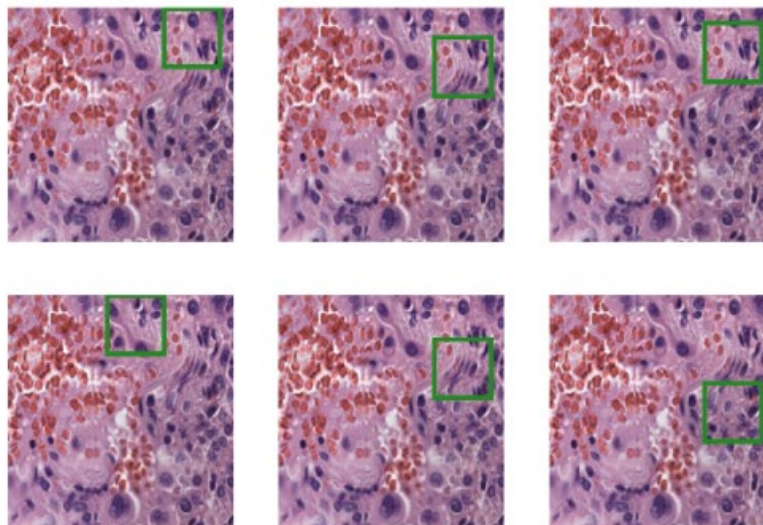

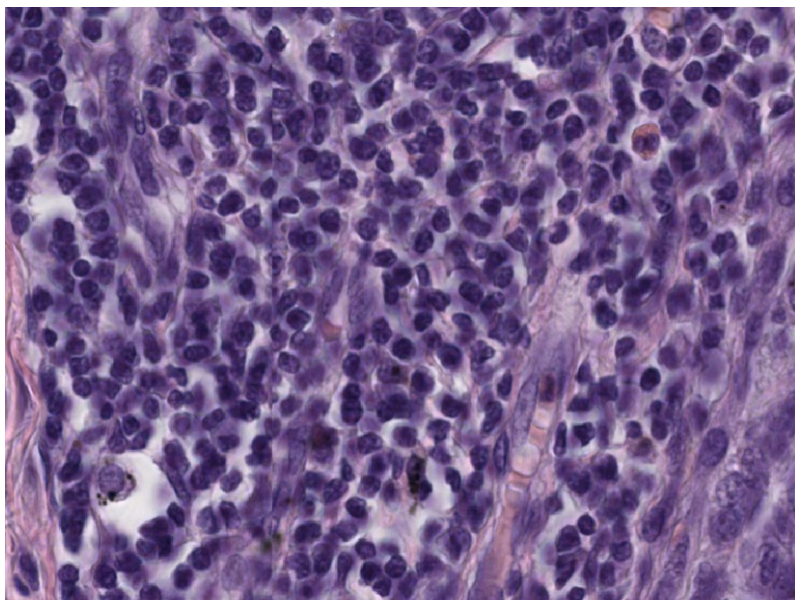

Out[72]: `matplotlib.image.AxesImage at 0x22ea983db18`

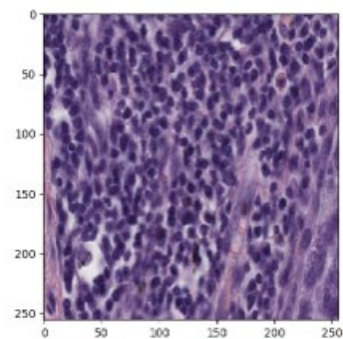

```
In [73]: # predict the class of the image
# predict method gives a probability whether the slide contains
# malignancy or not
# anything less than 0.5 means no malignancy found,
# greather than or equal to 0.5 means malignancy found
model.predict(image)
# 1 means 100% cancerous
# 0 means 100% healthy cell
```

1/1 [=====] - 0s 88ms/step

Out[73]: `array([1.], dtype=float32)`

```
In [74]: # what did the model see to determine that the slide had malignancy
# looking at the top 6 spots where the model found malignancy
malignant_spots(model.model, sample_image_path, confidence = 0.6)
```

Creating sliding windows over the picture ...  
Getting predictions ...  
5/5 [=====] - 7s 1s/step  
Drawing findings ...

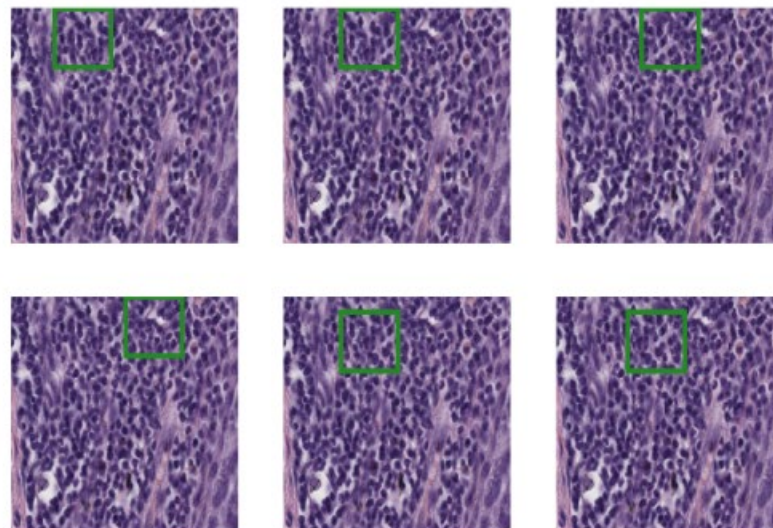

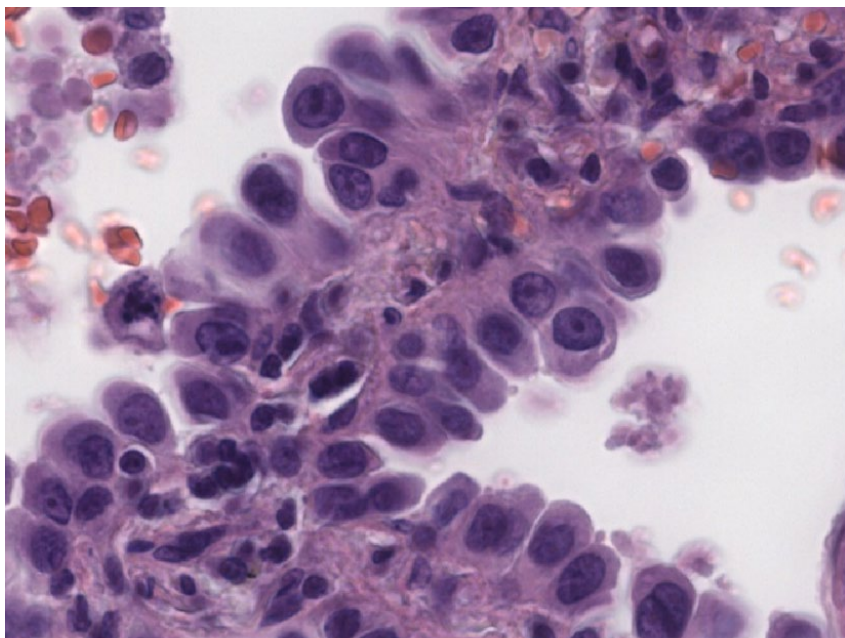

Out[77]: <matplotlib.image.AxesImage at 0x22ea9288ad8>

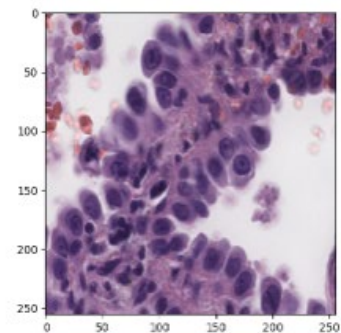

```
In [78]: # predict the class of the image
# predict method gives a probability whether the slide contains
# malignancy or not
# anything less than 0.5 means no malignancy found,
# greater than or equal to 0.5 means malignancy found
model.predict(image)
# 1 means 100% cancerous
# 0 means 100% healthy cell
```

1/1 [=====] - 0s 74ms/step

Out[78]: array([1.], dtype=float32)

```
In [79]: # what did the model see to determine that the slide had malignancy
# looking at the top 6 spots where the model found malignancy
malignant_spots(model.model, sample_image_path, confidence = 0.6)
```

Creating sliding windows over the picture ...  
Getting predictions ...  
5/5 [=====] - 7s 1s/step  
Drawing findings ...

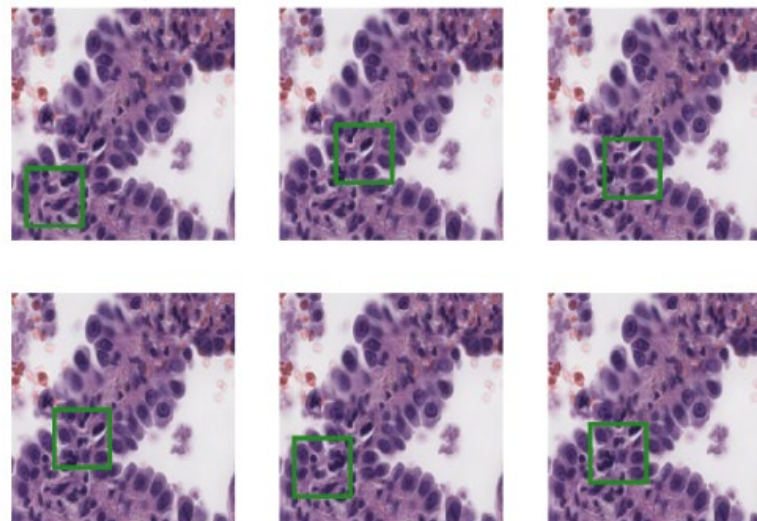

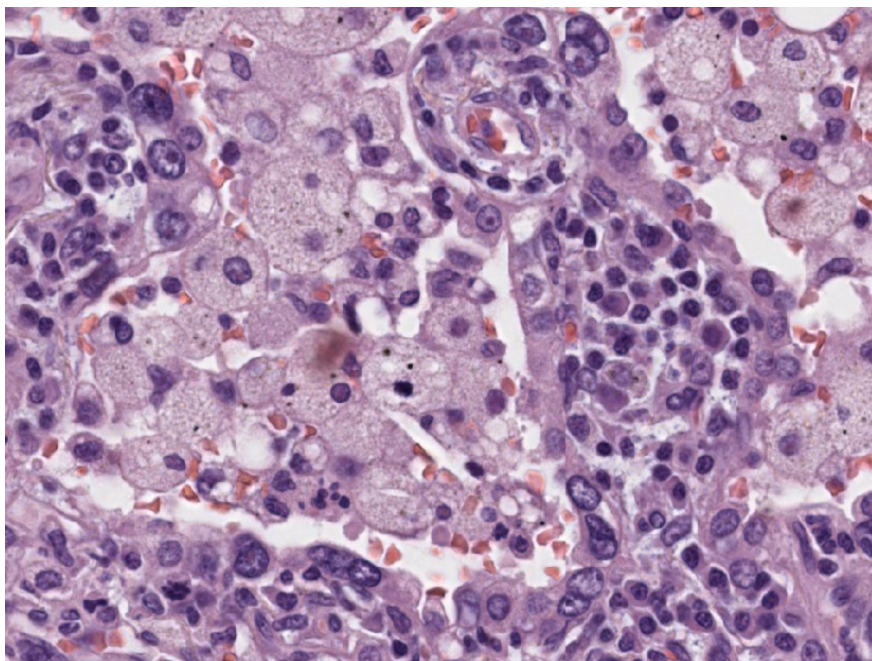

Out[82]: `matplotlib.image.AxesImage at 0x22ea0d48110`

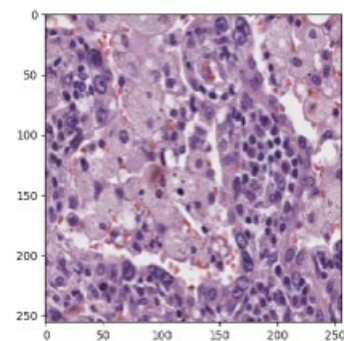

```
In [83]: # predict the class of the image
# predict method gives a probability whether the slide contains
# malignancy or not
# anything less than 0.5 means no malignancy found,
# greater than or equal to 0.5 means malignancy found
model.predict(image)
# 1 means 100% cancerous
# 0 means 100% healthy cell
```

1/1 [=====] - 0% 7ms/step

Out[83]: `array([1.], dtype=float32)`

```
In [84]: # what did the model see to determine that the slide had malignancy
# looking at the top 5 spots where the model found malignancy
malignant_spots(model.model, sample_image_path, confidence = 0.6)
```

Creating sliding windows over the picture ...  
Getting predictions ...  
5/5 [=====] - 7% 1s/step  
Drawing findings ...

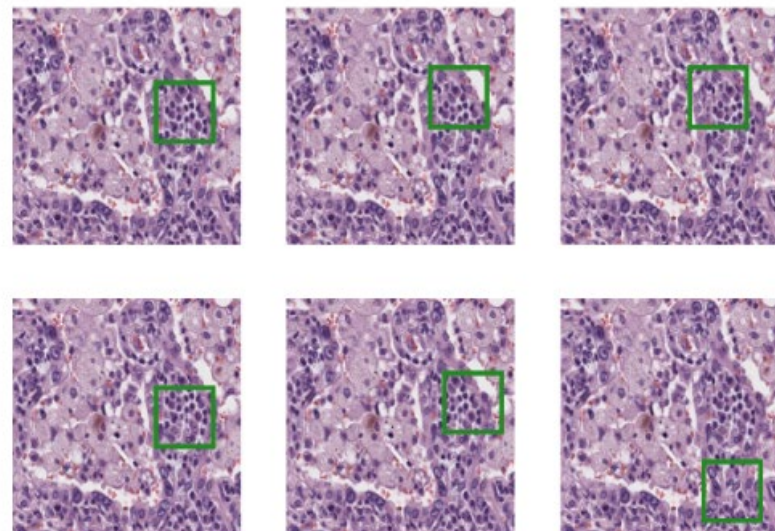

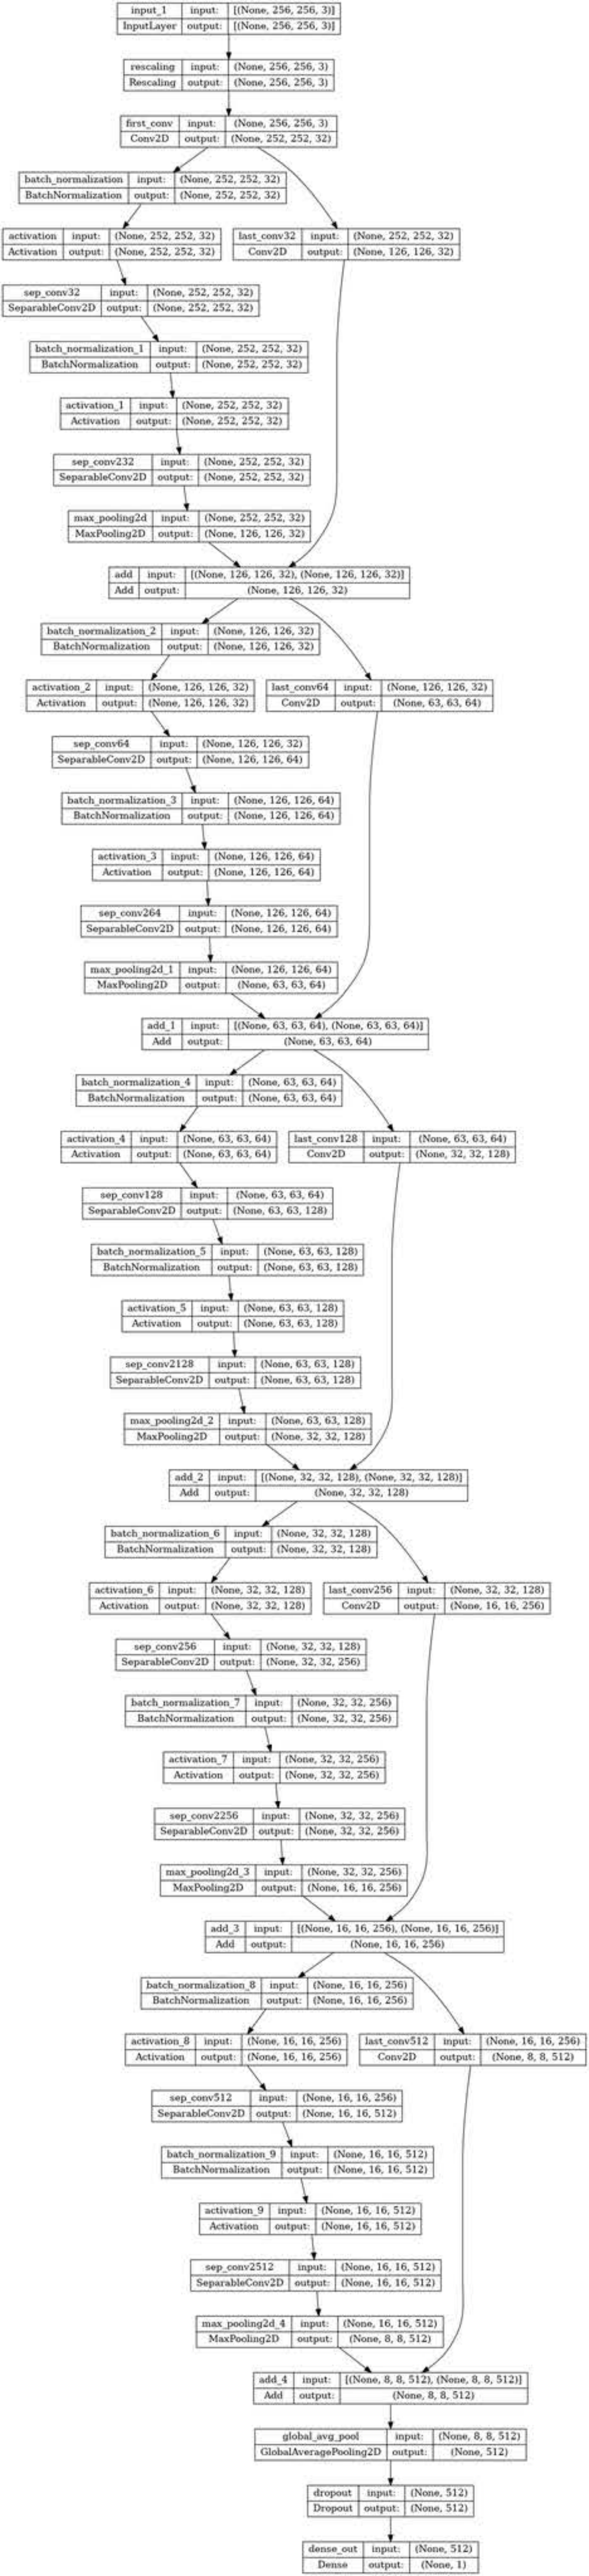

Creating sliding windows over the picture ...  
Getting predictions ...  
5/5 [=====] - 6s 1s/step  
Drawing findings ...

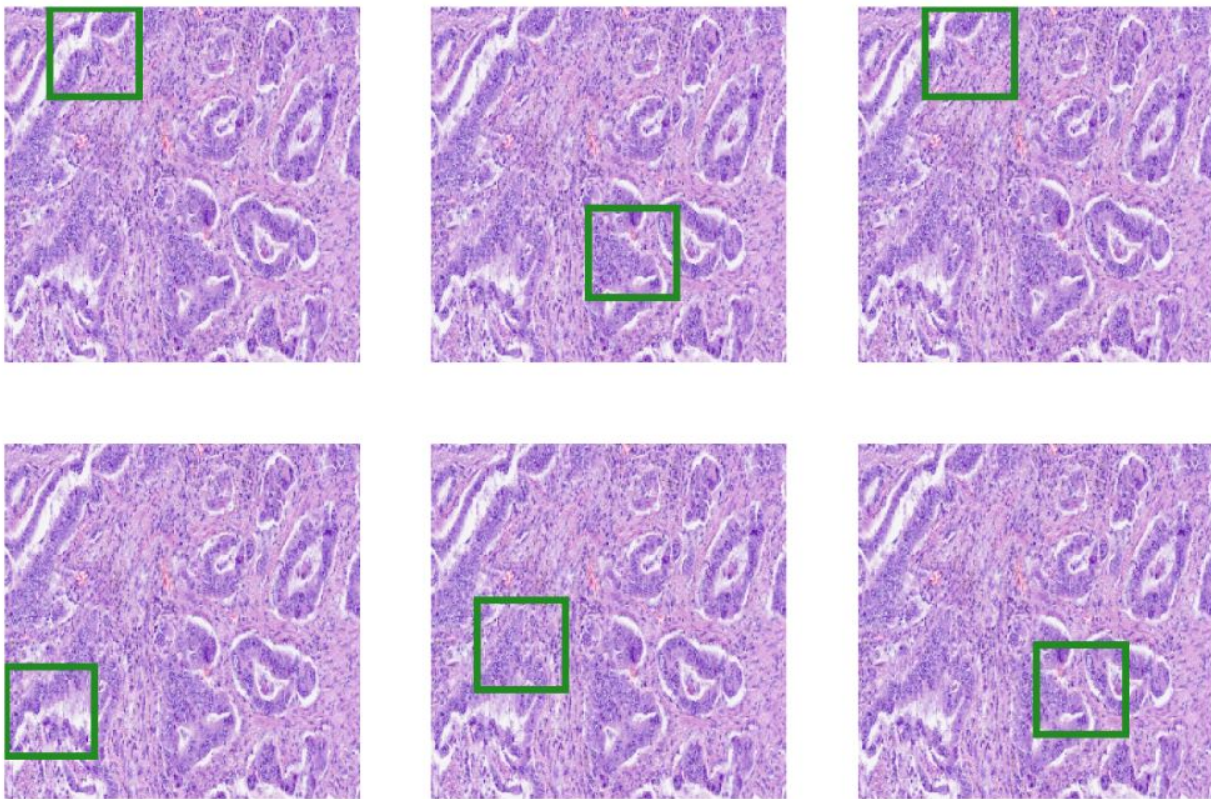

Image from our collected slides after running through the model

Creating sliding windows over the picture ...  
Getting predictions ...  
5/5 [=====] - 7s 1s/step  
Drawing findings ...

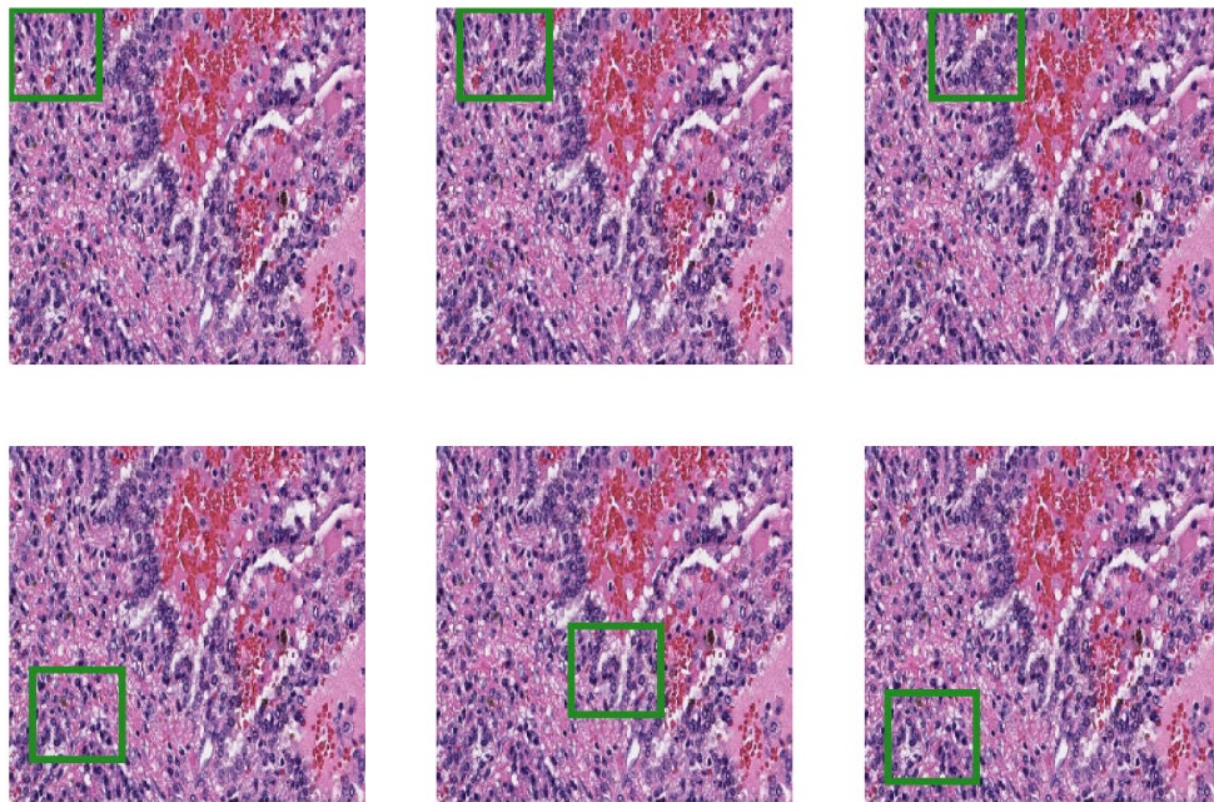

Image from external source after running through the model

Table S1. Comparing the results of the model by images from Department of Pathology and Laboratory Medicine at Dartmouth-Hitchcock Medical Center (DHMC) [1].

| <b>Image nr</b> | <b>Dartmouth-Hitchcock MC</b> | <b>Our model</b> |
|-----------------|-------------------------------|------------------|
| <b>1</b>        | solid                         | 1                |
| <b>2</b>        | solid                         | 1                |
| <b>3</b>        | solid                         | 1                |
| <b>4</b>        | solid                         | 1                |
| <b>5</b>        | lepidic                       | 1                |
| <b>6</b>        | acinar                        | 1                |
| <b>7</b>        | acinar                        | 1                |
| <b>8</b>        | solid                         | 1                |
| <b>9</b>        | acinar                        | 1                |
| <b>10</b>       | acinar                        | 1                |
| <b>11</b>       | acinar                        | 1                |
| <b>12</b>       | solid                         | 1                |
| <b>13</b>       | solid                         | 1                |
| <b>14</b>       | acinar                        | 1                |
| <b>15</b>       | acinar                        | 1                |
| <b>16</b>       | acinar                        | 1                |
| <b>17</b>       | solid                         | 1                |
| <b>18</b>       | lepidic                       | 1                |
| <b>19</b>       | lepidic                       | 1                |
| <b>20</b>       | micropapillary                | 1                |
| <b>21</b>       | solid                         | 1                |
| <b>22</b>       | solid                         | 1                |
| <b>23</b>       | acinar                        | 1                |
| <b>24</b>       | papillary                     | 1                |
| <b>25</b>       | solid                         | 1                |
| <b>26</b>       | acinar                        | 1                |
| <b>27</b>       | acinar                        | 1                |
| <b>28</b>       | solid                         | 1                |
| <b>29</b>       | solid                         | 1                |
| <b>30</b>       | solid                         | 1                |
| <b>31</b>       | micropapillary                | 1                |
| <b>32</b>       | micropapillary                | 1                |
| <b>33</b>       | lepidic                       | 1                |
| <b>34</b>       | acinar                        | 1                |
| <b>35</b>       | lepidic                       | 1                |
| <b>36</b>       | acinar                        | 1                |
| <b>37</b>       | solid                         | 1                |
| <b>38</b>       | lepidic                       | 1                |

|    |                |   |
|----|----------------|---|
| 39 | solid          | 1 |
| 40 | solid          | 1 |
| 41 | solid          | 1 |
| 42 | acinar         | 1 |
| 43 | solid          | 1 |
| 44 | solid          | 1 |
| 45 | solid          | 1 |
| 46 | solid          | 1 |
| 47 | solid          | 1 |
| 48 | acinar         | 1 |
| 49 | micropapillary | 1 |
| 50 | acinar         | 1 |
| 51 | papillary      | 1 |
| 52 | lepidic        | 1 |
| 53 | micropapillary | 1 |
| 54 | acinar         | 1 |
| 55 | solid          | 1 |
| 56 | acinar         | 1 |
| 57 | acinar         | 1 |
| 58 | acinar         | 1 |
| 59 | acinar         | 1 |
| 60 | micropapillary | 1 |
| 61 | acinar         | 1 |
| 62 | solid          | 1 |
| 63 | lepidic        | 1 |
| 64 | acinar         | 1 |
| 65 | solid          | 1 |
| 66 | acinar         | 1 |
| 67 | acinar         | 1 |
| 68 | acinar         | 1 |
| 69 | solid          | 1 |
| 70 | solid          | 1 |
| 71 | solid          | 1 |
| 72 | solid          | 1 |
| 73 | solid          | 1 |
| 74 | acinar         | 1 |
| 75 | solid          | 1 |
| 76 | solid          | 1 |
| 77 | solid          | 1 |
| 78 | acinar         | 1 |
| 79 | acinar         | 1 |
| 80 | acinar         | 1 |
| 81 | lepidic        | 1 |

|            |           |   |
|------------|-----------|---|
| <b>82</b>  | acinar    | 1 |
| <b>83</b>  | acinar    | 1 |
| <b>84</b>  | acinar    | 1 |
| <b>85</b>  | acinar    | 1 |
| <b>86</b>  | lepidic   | 1 |
| <b>87</b>  | lepidic   | 1 |
| <b>88</b>  | acinar    | 1 |
| <b>89</b>  | acinar    | 1 |
| <b>90</b>  | acinar    | 1 |
| <b>91</b>  | solid     | 1 |
| <b>92</b>  | acinar    | 1 |
| <b>93</b>  | lepidic   | 1 |
| <b>94</b>  | acinar    | 1 |
| <b>95</b>  | solid     | 1 |
| <b>96</b>  | papillary | 1 |
| <b>97</b>  | acinar    | 1 |
| <b>98</b>  | acinar    | 1 |
| <b>99</b>  | acinar    | 1 |
| <b>100</b> | acinar    | 1 |
| <b>101</b> | lepidic   | 1 |
| <b>102</b> | lepidic   | 1 |
| <b>103</b> | acinar    | 1 |
| <b>104</b> | acinar    | 1 |
| <b>105</b> | acinar    | 1 |

## References

1. Wei, J.W.; Tafe, L.J.; Linnik, Y.A.; Vaickus, L.J.; Tomita, N.; Hassanpour, S. Pathologist-Level Classification of Histologic Patterns on Resected Lung Adenocarcinoma Slides with Deep Neural Networks. *Sci Rep* **2019**, *9*, 3358, doi:10.1038/s41598-019-40041-7.
